# Supplementary material
Source: publisher figshare collection journal article supplement (https://diabetesjournals.figshare.com/articles/dataset/_/23279792)
Supplement: Supplementary file 2 [file 1]

## Online-Only Supplemental Material

**Supplementary Table S1.** Expert ranking of T1-DDS-28 item influence and importance and correlations with subscales and total T1-DDS score

|                                     |           | Average influence<br>ranking | Proportion rating<br>item as most<br>important | Subscale<br>correlation | Total scale<br>correlation |
|-------------------------------------|-----------|------------------------------|------------------------------------------------|-------------------------|----------------------------|
| Subscale                            | Item      | N=14                         | N=14                                           | N=2,016                 | N=2,016                    |
| Powerlessness                       | 5         | 7.79                         | 0.29                                           | 0.81                    | 0.72                       |
|                                     | 9         | 5.07                         | 0.00                                           | 0.66                    | 0.59                       |
|                                     | 13        | 7.57                         | 0.14                                           | 0.81                    | 0.72                       |
|                                     | 21        | 7.36                         | 0.00                                           | 0.86                    | 0.78                       |
|                                     | <b>25</b> | <b>8.64</b>                  | <b>0.57</b>                                    | <b>0.88</b>             | <b>0.82</b>                |
| Negative social<br>perceptions      | <b>4</b>  | <b>5.43</b>                  | <b>0.57</b>                                    | <b>0.79</b>             | <b>0.58</b>                |
|                                     | 10        | 5.07                         | 0.29                                           | 0.78                    | 0.53                       |
|                                     | 19        | 5.07                         | 0.00                                           | 0.80                    | 0.62                       |
|                                     | 24        | 5.00                         | 0.14                                           | 0.83                    | 0.58                       |
| Physician distress                  | 7         | 5.21                         | 0.21                                           | 0.81                    | 0.62                       |
|                                     | 14        | 5.64                         | 0.21                                           | 0.84                    | 0.57                       |
|                                     | <b>18</b> | <b>6.00</b>                  | <b>0.57</b>                                    | <b>0.88</b>             | <b>0.57</b>                |
|                                     | 26        | 3.64                         | 0.00                                           | 0.87                    | 0.54                       |
| Friend/family distress <sup>a</sup> | 6         | 4.29                         | 0.23                                           | 0.84                    | 0.54                       |
|                                     | 11        | 4.50                         | 0.08                                           | 0.83                    | 0.48                       |
|                                     | 17        | 4.79                         | 0.23                                           | 0.84                    | 0.58                       |
|                                     | <b>20</b> | <b>5.57</b>                  | <b>0.46</b>                                    | <b>0.80</b>             | <b>0.52</b>                |
| Hypoglycaemia<br>distress           | 3         | 5.71                         | 0.07                                           | 0.71                    | 0.44                       |
|                                     | 15        | 7.00                         | 0.07                                           | 0.81                    | 0.59                       |
|                                     | 22        | 5.64                         | 0.00                                           | 0.74                    | 0.53                       |
|                                     | <b>27</b> | <b>7.86</b>                  | <b>0.86</b>                                    | <b>0.82</b>             | <b>0.66</b>                |
| Management distress                 | <b>1</b>  | <b>8.00</b>                  | <b>0.71</b>                                    | <b>0.82</b>             | <b>0.73</b>                |
|                                     | 8         | 5.64                         | 0.00                                           | 0.76                    | 0.59                       |
|                                     | 12        | 5.93                         | 0.07                                           | 0.73                    | 0.48                       |
|                                     | 28        | 7.29                         | 0.21                                           | 0.88                    | 0.72                       |
| Eating distress                     | 2         | 5.64                         | 0.29                                           | 0.79                    | 0.62                       |
|                                     | <b>16</b> | <b>6.64</b>                  | <b>0.64</b>                                    | <b>0.81</b>             | <b>0.71</b>                |
|                                     | 23        | 5.43                         | 0.07                                           | 0.89                    | 0.67                       |

NOTE: Bolded items were retained in the DDS-T1-7

<sup>a</sup> One response missing for rating of importance.

**Supplementary Table S2.** Factorial validity and reliability of T1-DDS-7 in samples stratified on age, diabetes duration and education

|                                 | Age <50<br>years       | Age ≥50<br>years       | Diabetes<br>duration ≤10<br>years | Diabetes<br>duration >10<br>years | Low education<br>(unknown/basic /vocational) | Higher<br>education    |
|---------------------------------|------------------------|------------------------|-----------------------------------|-----------------------------------|----------------------------------------------|------------------------|
|                                 | N=796                  | N=1,220                | N=231                             | N=1,777                           | N=997                                        | N=1,019                |
| <b>Factorial validity</b>       |                        |                        |                                   |                                   |                                              |                        |
| Eigenvalue                      | 2.71                   | 2.81                   | 2.86                              | 2.83                              | 2.83                                         | 2.82                   |
| Proportion of<br>variance       | 39%                    | 40%                    | 41%                               | 40%                               | 40%                                          | 40%                    |
| Standardized factor<br>loadings |                        |                        |                                   |                                   |                                              |                        |
| Item 1                          | 0.66                   | 0.65                   | 0.68                              | 0.68                              | 0.67                                         | 0.69                   |
| Item 2                          | 0.50                   | 0.52                   | 0.47                              | 0.53                              | 0.50                                         | 0.54                   |
| Item 3                          | 0.71                   | 0.72                   | 0.73                              | 0.73                              | 0.71                                         | 0.74                   |
| Item 4                          | 0.46                   | 0.49                   | 0.52                              | 0.49                              | 0.50                                         | 0.48                   |
| Item 5                          | 0.46                   | 0.47                   | 0.53                              | 0.45                              | 0.47                                         | 0.44                   |
| Item 6                          | 0.87                   | 0.84                   | 0.84                              | 0.86                              | 0.90                                         | 0.82                   |
| Item 7                          | 0.59                   | 0.65                   | 0.63                              | 0.62                              | 0.60                                         | 0.63                   |
| <b>Reliability</b>              |                        |                        |                                   |                                   |                                              |                        |
| Cronbach's $\alpha$ (95%<br>CI) | 0.81 (0.78 to<br>0.83) | 0.82 (0.80 to<br>0.84) | 0.82 (0.77 to<br>0.85)            | 0.82 (0.80 to<br>0.83)            | 0.82 (0.80 to<br>0.84)                       | 0.82 (0.80<br>to 0.84) |

**Supplementary Table S3.** Correlations between T1-DDS-7, T1-DDS-28, PAID-20, and PAID-5 with other psychosocial measurements

|                      | T1-DDS-7 |       | T1-DDS-28 |       | PAID-20 <sup>a</sup> |       | PAID-5 <sup>a</sup> |       |
|----------------------|----------|-------|-----------|-------|----------------------|-------|---------------------|-------|
|                      | r        | N     | r         | N     | r                    | N     | r                   | N     |
| T1-DDS-28            | 0.95*    | 2,016 | -         | -     | 0.91*                | 1,332 | 0.84*               | 1,332 |
| PAID-20 <sup>a</sup> | 0.89*    | 1,332 | 0.91*     | 1,332 | -                    | -     | 0.95*               | 1,332 |
| PAID-5 <sup>a</sup>  | 0.83*    | 1,332 | 0.84*     | 1,332 | 0.95*                | 1,332 | -                   | -     |
| WHO-5                | -0.56*   | 2,016 | -0.58*    | 2,016 | -0.67*               | 1,332 | -0.65*              | 1,332 |
| HbA1c <sup>b</sup>   | 0.24*    | 1,994 | 0.24*     | 1,994 | 0.25*                | 1,332 | 0.23*               | 1,332 |

\* p < 0.001

<sup>a</sup> 684 participants using insulin pumps completed a version of the survey omitting the PAID-20.

<sup>b</sup> 22 missing responses

**Supplementary Table S4.** Correlations coefficients (r) with T1-DDS-7 in samples stratified on age, diabetes duration and education

|                                | Age <50 years | Age ≥50 years | Diabetes duration<br>≤10 years | Diabetes duration<br>>10 years | Low education<br>(unknown/basic/vocational) | Higher education |
|--------------------------------|---------------|---------------|--------------------------------|--------------------------------|---------------------------------------------|------------------|
|                                | N=796         | N=1,220       | N=231                          | N=1,777                        | N=997                                       | N=1,019          |
| T1-DDS-28                      |               |               |                                |                                |                                             |                  |
| Powerlessness                  | 0.87*         | 0.87*         | 0.87*                          | 0.88*                          | 0.88*                                       | 0.88*            |
| Negative social<br>perceptions | 0.68*         | 0.67*         | 0.65*                          | 0.69*                          | 0.69*                                       | 0.69*            |
| Physician distress             | 0.63*         | 0.65*         | 0.66*                          | 0.64*                          | 0.66*                                       | 0.63*            |
| Friend/family distress         | 0.61*         | 0.61*         | 0.62*                          | 0.60*                          | 0.61*                                       | 0.59*            |
| Hypoglycaemia distress         | 0.67*         | 0.71*         | 0.71*                          | 0.68*                          | 0.67*                                       | 0.69*            |
| Management distress            | 0.69*         | 0.72*         | 0.70*                          | 0.72*                          | 0.69*                                       | 0.76*            |
| Eating distress                | 0.78*         | 0.78*         | 0.78*                          | 0.80*                          | 0.78*                                       | 0.81*            |
| Total distress                 | 0.95*         | 0.95*         | 0.95*                          | 0.95*                          | 0.95*                                       | 0.95*            |
| PAID-20 <sup>a</sup>           | 0.89*         | 0.88*         | 0.90*                          | 0.89*                          | 0.90*                                       | 0.89*            |
| PAID-5 <sup>a</sup>            | 0.82*         | 0.81*         | 0.83*                          | 0.83*                          | 0.83*                                       | 0.83*            |
| WHO-5                          | -0.53*        | -0.54*        | -0.59*                         | -0.55*                         | -0.58*                                      | -0.54*           |
| HbA1c <sup>b</sup>             | 0.37*         | 0.12*         | 0.35*                          | 0.22*                          | 0.27*                                       | 0.19*            |

\* p &lt;0.001

<sup>a</sup> 684 participants using an insulin pump completed a version of the survey omitting the PAID-20.<sup>b</sup> 22 missing responses

**Supplementary Table S5.** Sensitivity and specificity for T1-DDS-7, T1-DDS-28, PAID-5, and PAID-20, %

| Reference                              | T1-DDS-7 score $\geq 2$<br>N=2,016 |             | T1-DDS-28 score $\geq 2$<br>N=2,016 |             | PAID-5 score $\geq 8^a$<br>N=1,332 |             | PAID-20 score $\geq 30^a$<br>N=1,332 |             |
|----------------------------------------|------------------------------------|-------------|-------------------------------------|-------------|------------------------------------|-------------|--------------------------------------|-------------|
|                                        | Sensitivity                        | Specificity | Sensitivity                         | Specificity | Sensitivity                        | Specificity | Sensitivity                          | Specificity |
| T1-DDS-28 total score $\geq 2$         | 93                                 | 89          | -                                   | -           | 70                                 | 93          | 73                                   | 97          |
| T1-DDS-28 with subscale score $\geq 2$ | 53                                 | 100         | 48                                  | 100         | 39                                 | 100         | 38                                   | 100         |
| Powerlessness                          | 66                                 | 97          | 61                                  | 99          | 50                                 | 99          | 48                                   | 99          |
| Negative social perceptions            | 83                                 | 72          | 82                                  | 77          | 68                                 | 82          | 67                                   | 84          |
| Physician distress                     | 86                                 | 70          | 84                                  | 75          | 62                                 | 79          | 68                                   | 83          |
| Friend/family distress                 | 80                                 | 70          | 79                                  | 75          | 61                                 | 78          | 61                                   | 80          |
| Hypoglycaemia distress                 | 66                                 | 80          | 63                                  | 85          | 50                                 | 87          | 49                                   | 89          |
| Management distress                    | 73                                 | 83          | 71                                  | 88          | 54                                 | 88          | 55                                   | 91          |
| Eating distress                        | 71                                 | 91          | 65                                  | 92          | 51                                 | 92          | 51                                   | 95          |
| PAID-20 score $\geq 30^a$              | 94                                 | 79          | 93                                  | 86          | 89                                 | 94          | -                                    | -           |
| PAID-5 score $\geq 8^a$                | 88                                 | 78          | 86                                  | 84          | -                                  | -           | 85                                   | 95          |

<sup>a</sup> 684 participants using an insulin pump completed a version of the survey omitting the PAID-20.
